# Supplementary material
Source: Springer Nature journal article supplement (https://www.springermedizin.de/resource/supplementary/12884_2011_606_MOESM4_ESM.pdf/9457816)

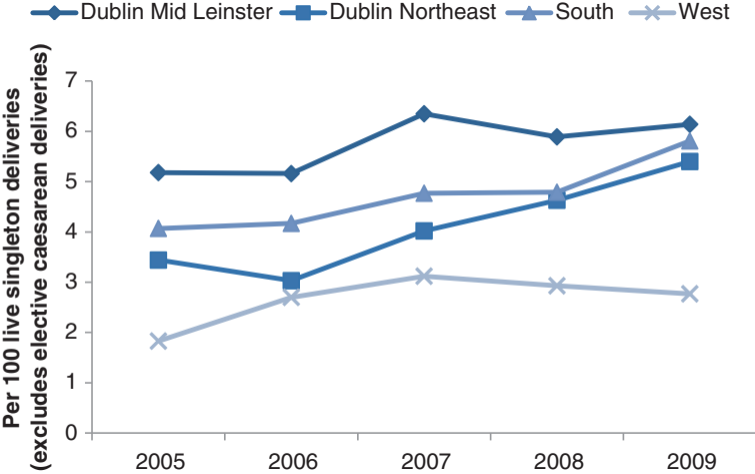

Supplement: MOESM4 [file 9457816]
